# Supplementary material for: Analysis of association between circulating miR-122 and histopathological features of nonalcoholic fatty liver disease in patients free of hepatocellular carcinoma
Source: BMC Gastroenterol. 2016 Dec 12;16:141. doi: 10.1186/s12876-016-0557-6 (PMC5153912; doi:10.1186/s12876-016-0557-6)
Supplement: Additional file 1: — Histological scores at the time of the first and second liver biopsies, and serum microRNA-122 ratio. (XLS 306 kb) [file 12876_2016_557_MOESM1_ESM.xls]

## Sheet: data
Case	Steatosis.1st	Steatosis.2nd	Ballooning.1st	Ballooning.2nd	Lobular.1st	Lobular.2nd	Stage.1st	Stage.2nd	miR.ratio
1	3	1	2	1	2	0	3	1	0.102886
2	2	2	1	1	1	1	1	1	3.50416
3	2	2	2	2	3	1	4	3	0.160177
4	2	1	2	2	3	1	2	1	0.075978
5	2	2	1	1	2	2	1	3	6.512
6	2	2	1	1	0	1	0	1	1.97734
7	1	1	1	1	2	1	2	1	0.126665
8	1	2	0	1	1	1	0	1	0.591713
9	3	1	1	2	1	1	3	3	0.0798108
10	2	2	1	1	0	2	0	1	0.260172
11	2	2	1	2	2	2	3	4	0.914031
12	1	1	1	2	3	2	2	3	0.126549
13	3	3	1	1	1	2	1	3	1.25877
14	1	2	0	1	0	1	0	0	0.202392
15	2	1	2	0	1	1	3	3	0.188024
16	3	2	1	1	2	2	1	1	0.811313
17	2	2	1	1	2	1	1	1	0.423182
18	2	1	1	1	1	1	1	2	0.557221
19	2	2	2	0	1	1	1	0	0.224391
20	3	3	2	2	2	1	3	3	3.70051
21	2	2	1	1	1	2	1	1	1.70048
22	2	1	2	2	2	2	3	3	0.568633
23	2	1	1	1	2	1	3	3	0.683329
24	3	1	2	0	2	1	3	3	0.121814
25	1	1	1	1	1	1	1	1	0.514308
26	2	2	1	1	1	2	0	1	24.5871
27	2	1	2	1	3	1	3	3	0.332628
28	1	2	1	1	1	2	1	1	2.95163
29	2	2	2	1	2	1	1	1	0.361747
30	2	0	1	0	2	0	2	1	0.13126
31	3	3	1	1	3	2	2	2	2.3453
32	1	1	1	1	1	2	2	2	1.42138
33	3	3	2	2	1	2	1	2	1.16162
34	2	3	1	1	1	1	1	1	1.56997
35	1	1	2	2	0	2	3	3	3.71674
36	2	1	2	1	2	1	3	2	0.205394
